# Supplementary material
Source: PubMed Central journal article supplement (PMC8599551)
Supplement: 11357_2021_422_MOESM1_ESM.pdf [file 11357_2021_422_MOESM1_ESM.pdf]

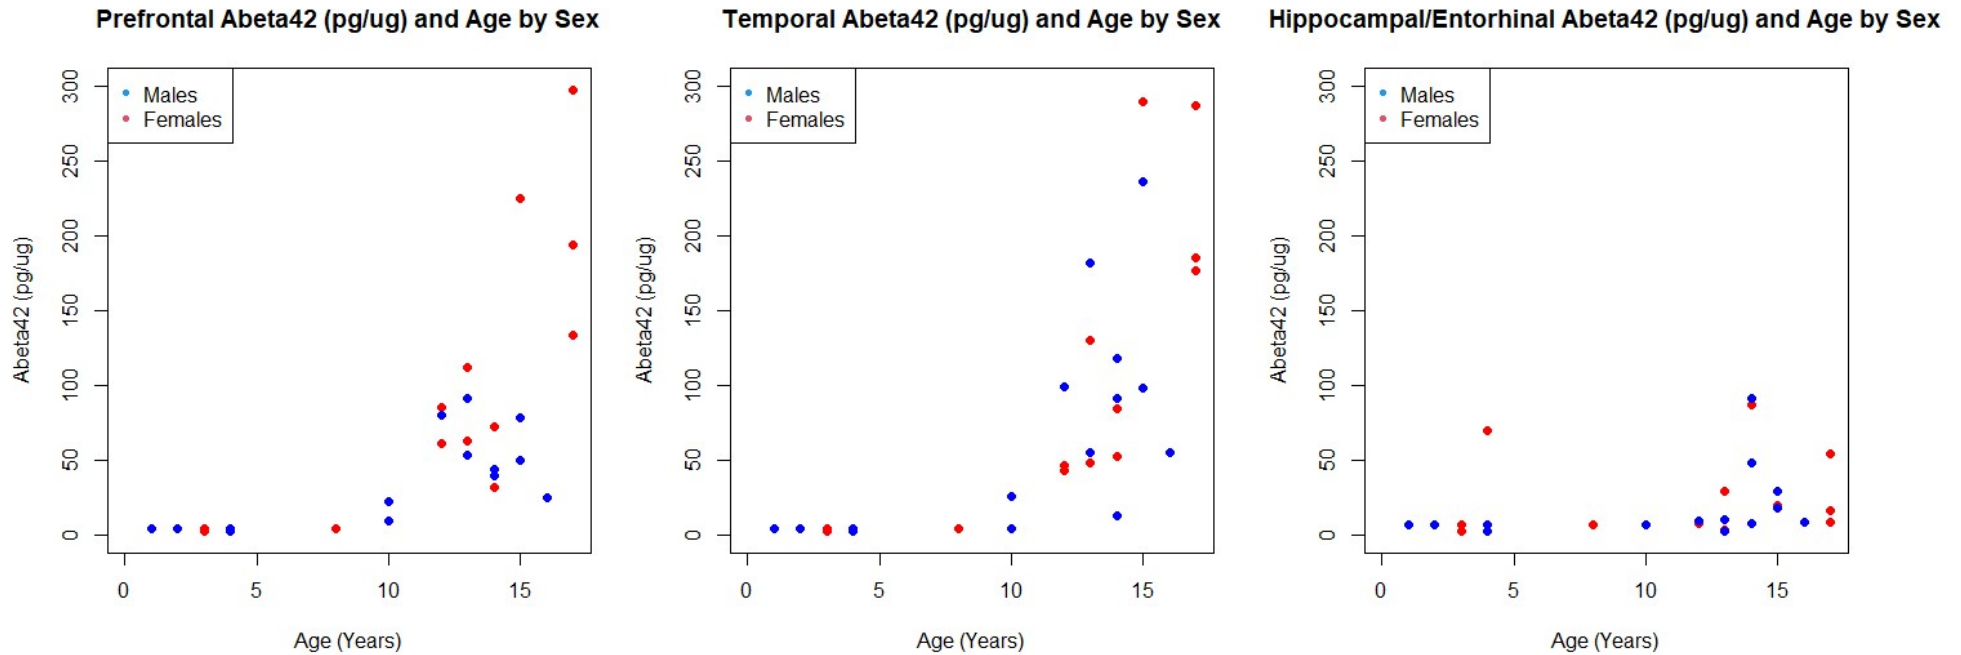

**Supplemental Figure 1** A $\beta$ 42 levels in all three brain regions by sex. There is a significant sex difference in prefrontal cortex A $\beta$ 42 levels in dogs aged 5-10 years and over, with females having significantly higher A $\beta$ 42 levels than males (P=0.043012, Wilcoxon rank-sum two-sided test). There was no significant age difference between the sexes (P=0.64, Wilcoxon rank-sum two-sided test).
