# Supplementary material
Source: PubMed Central journal article supplement (PMC8599551)

## Abeta42 (pg/ug) in Brain and Cognitive Scores

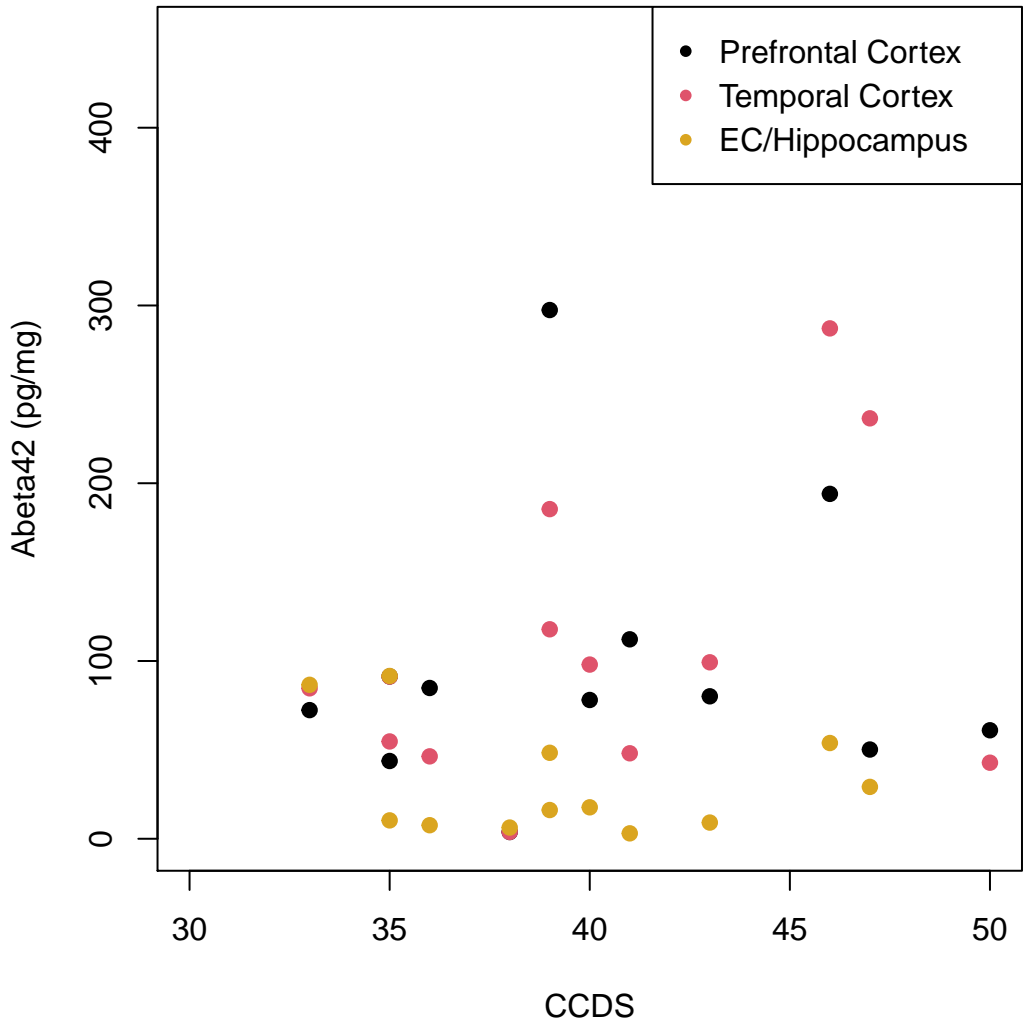

Supplement: 11357_2021_422_MOESM2_ESM.pdf [file 11357_2021_422_MOESM2_ESM.pdf]
